# Supplementary material for: In Situ Activation and Heterologous Production of a Cryptic Lantibiotic from an African Plant Ant-Derived Saccharopolyspora Species
Source: PubMed Central journal article supplement (PMC6974636; doi:10.1128/aem.01876-19), 2020-01-21
Supplement: zam003209566s1.pdf [file zam003209566s1.pdf]

1. KY3  
2. KY7  
3. KY21

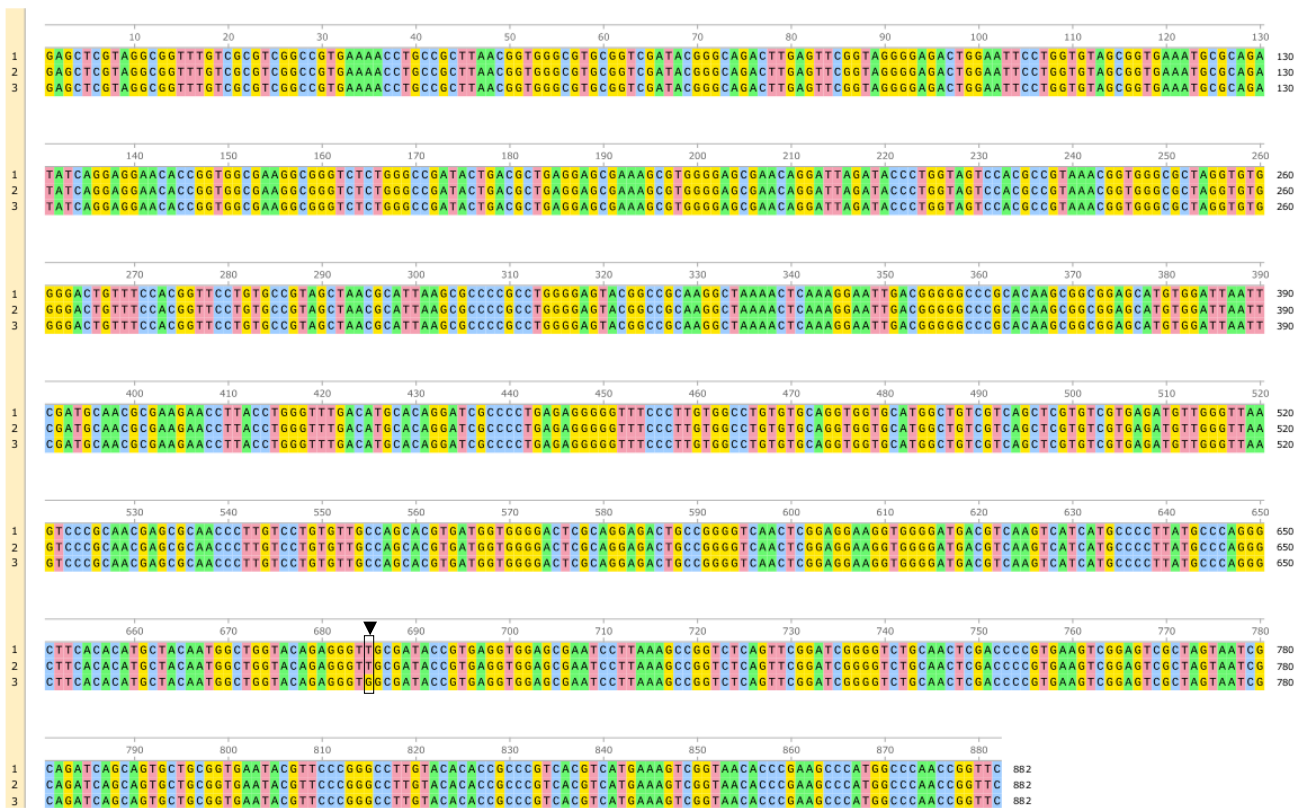

**FIG S1 Alignment of *Saccharopolyspora* sp. KY3, KY7 and KY21 16S rDNA sequences.** The alignment was performed with Clustal Omega (v1.2.4) and the figure was generated by SnapGene Viewer (v4.2.11). The difference between KY21 to strains KY3 and KY7 is indicated with a black arrow and a box at position 685.

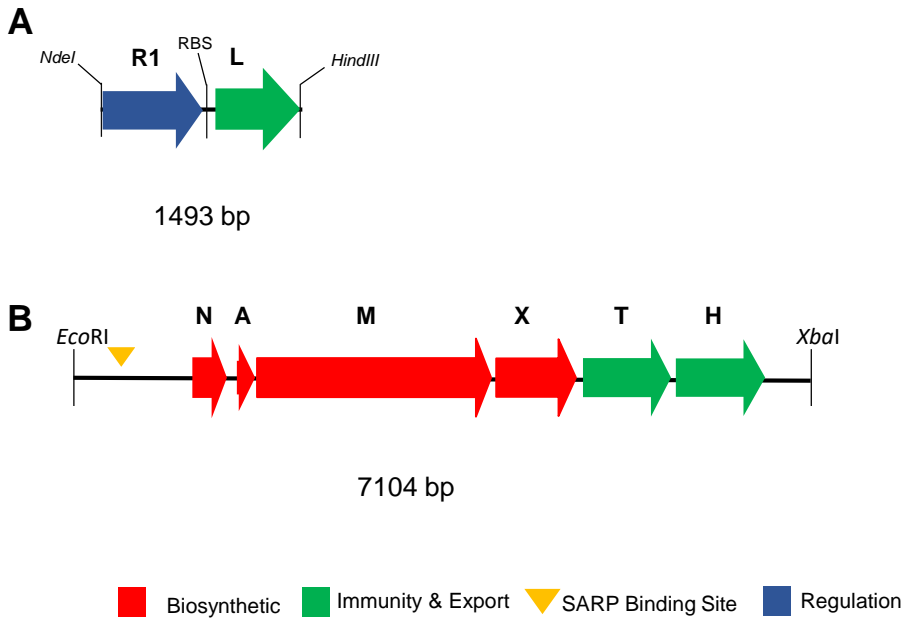

**FIG S2 Schematic of synthetic artificial operons. (A)** The operon consisting of *kyaR1*, encoding a *Streptomyces* antibiotic regulatory protein (SARP), and *kyaL*, encoding a PE-methyl transferase that provides resistance – the homologues of *cinR1* and *cinorf10* respectively. **(B)** The operon carrying genes *kyaN* to *kyaH* as an *EcoRI/XbaI* fragment. These genes are expected to be essential for kyamycin biosynthesis.

**A**

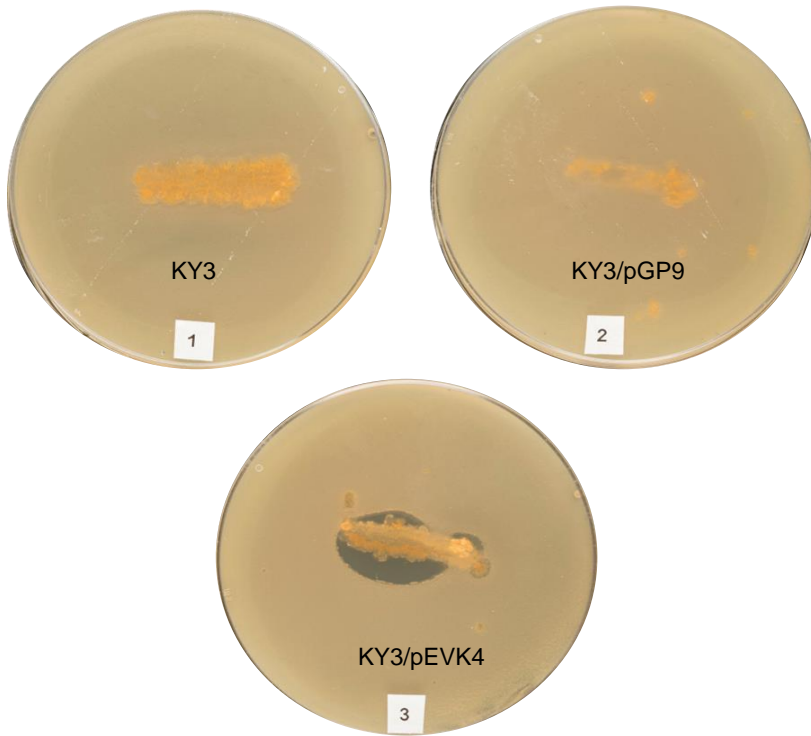

**B**

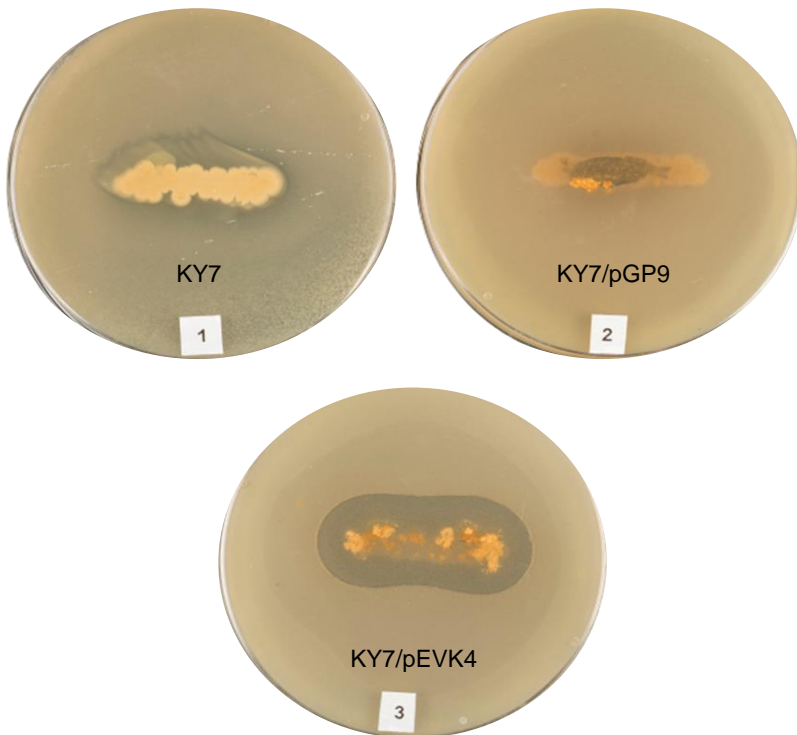

**FIG S3 Activation of kyamicin biosynthesis in KY3 and KY7.** The pEVK4 vector containing *kyaR1* and *kyaL* results in a zone of inhibition, corresponding to the production of kyamicin, in contrast to the pGP9 empty vector control or the wildtype strain. **(A)** Activation of kyamicin production in KY3, and **(B)** in KY7 strains.

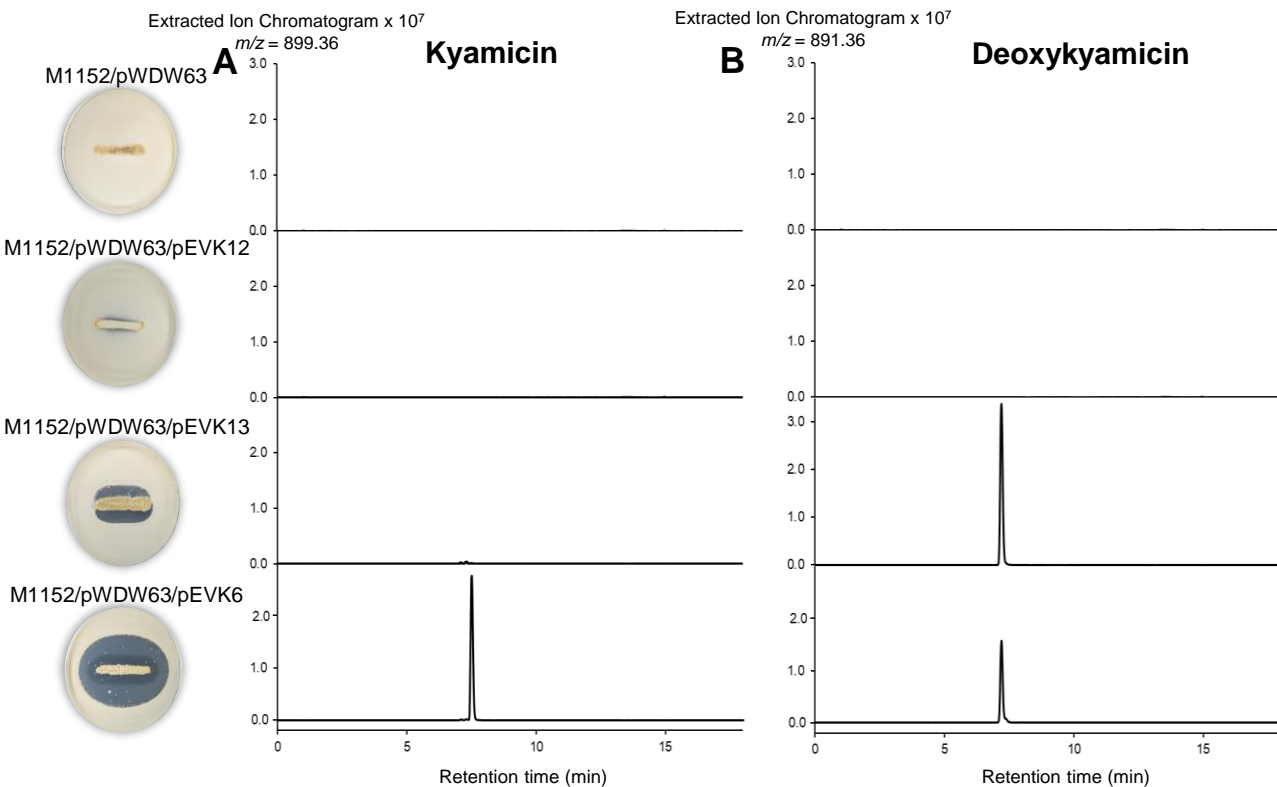

**FIG S4 Dissection of the contribution of *kyaR1* and *kyaL* to kyamicin BGC activation.** Overlay bioassays were carried out with *B. subtilis* EC1524 and agar plugs were taken adjacent to the central streak and analysed by UPLC/MS. The pEVK12 vector containing only *kyaL* does not result in a zone of inhibition. The pEVK13 vector containing only *kyaR1* results in a zone of inhibition, corresponding to the production of deoxykyamicin only. Expression of both pEVK12 and pEVK13 results in a zone of inhibition, corresponding to the production of both kyamicin and deoxykyamicin. Images and LC traces are representative of at least three biological repeats. **(A)** Extracted ion chromatograms are shown where  $m/z = 899.36$  ( $[M + 2H]^{2+}$ ). **(B)** Extracted ion chromatograms are shown where  $m/z = 891.36$  ( $[M + 2H]^{2+}$ ).

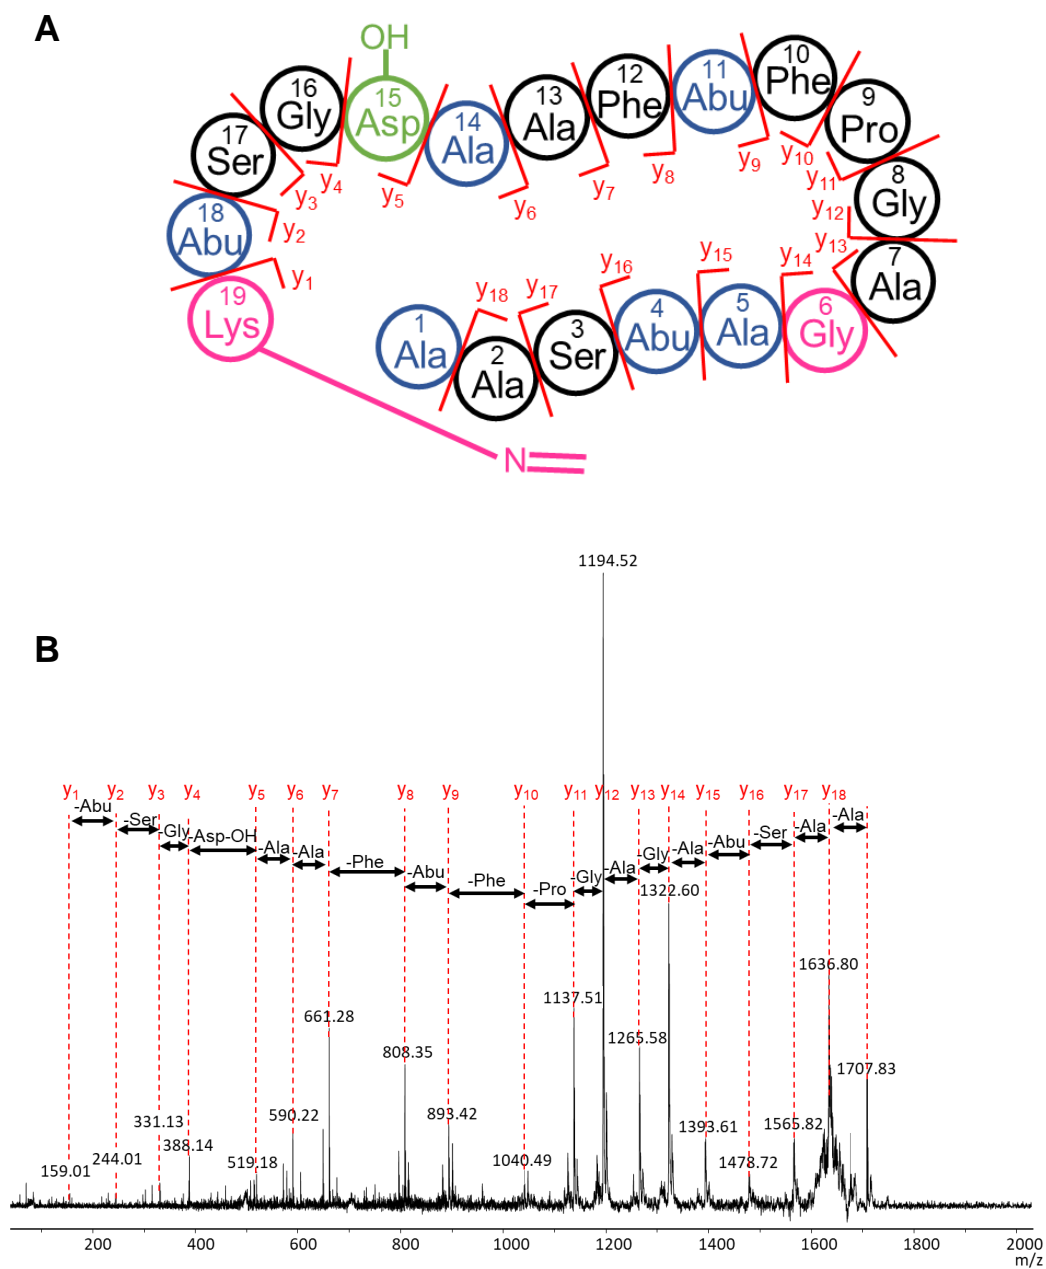

**FIG S5 Kyamicin fragmentation.** Following reduction to remove methylanthionine bridges, kyamicin was subject to MALDI-ToF tandem MS, giving the complete y ion ( $\text{NH}_3^+$ ) series. **(A)** Structure of reduced kyamicin and the  $y_1 - y_{18}$  ion series. **(B)** MALDI-ToF tandem MS spectrum with the y ion series indicated with dashed red lines.

**A**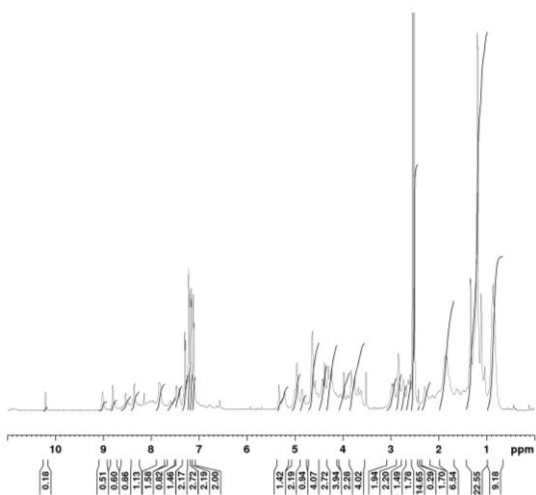**B**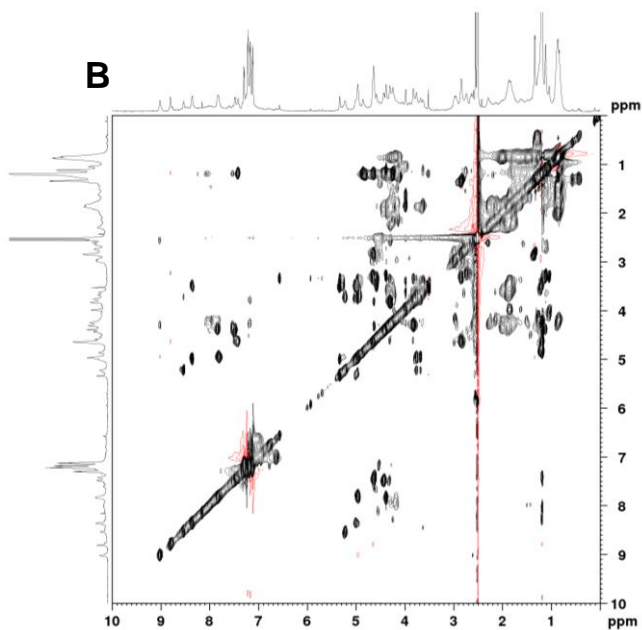**C**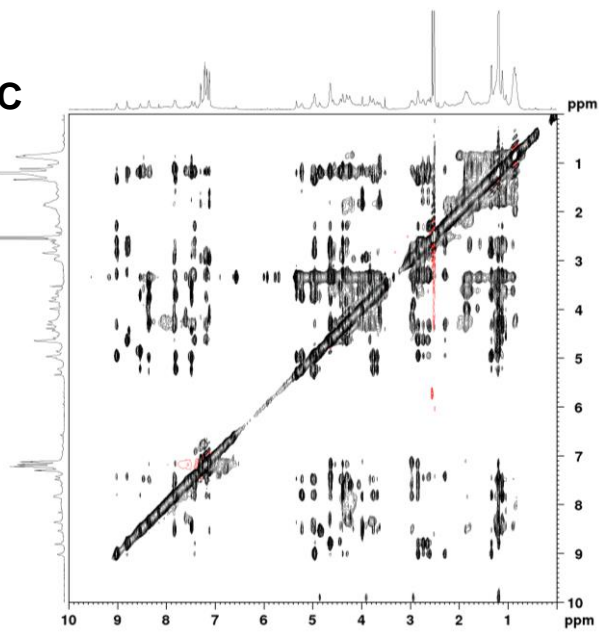**D**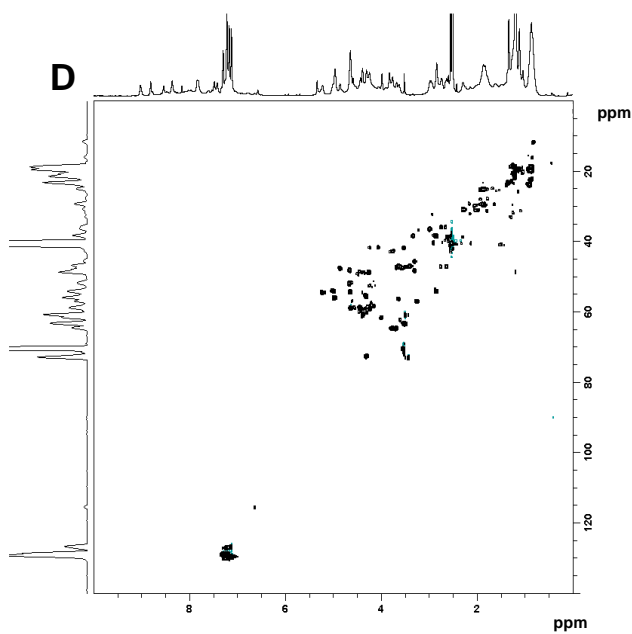

**FIG S6 Kyamicin NMR Spectra. (A)**  $^1\text{H}$  NMR spectrum. **(B)** TOCSY spectrum. **(C)** NOESY spectrum. **(D)** HSQC spectrum.

**TABLE S1 Recipes for liquid screening media.** Quantities of components are given in g/L. SM = screening media.

|      | Maltodextrin | Bacto Soy peptone | Bacto Peptone | CaCl <sub>2</sub> [0.02 M] | CaCl <sub>2</sub> *2H <sub>2</sub> O | CaCO <sub>3</sub> | Casamino acids | Corn steep liquor | EDTA | Glucose | Glycerol solution | K <sub>2</sub> HPO <sub>4</sub> | L-Glutamate | L-Proline | Malt extract | Maltose | Meat Extract | MgSO <sub>4</sub> [0.2 M] | MgSO <sub>4</sub> *7H <sub>2</sub> O | Molasses (cane) | MOPS | NaCl | Oatflour | Cotton seed flour | Soluble starch | Soya flour | Tomato paste | Trace salts No.1 | Yeast extract | ZnSO <sub>4</sub> *7H <sub>2</sub> O | Distilled water (to 1L) | Tap water (to 1L) | pH  |     |
|------|--------------|-------------------|---------------|----------------------------|--------------------------------------|-------------------|----------------|-------------------|------|---------|-------------------|---------------------------------|-------------|-----------|--------------|---------|--------------|---------------------------|--------------------------------------|-----------------|------|------|----------|-------------------|----------------|------------|--------------|------------------|---------------|--------------------------------------|-------------------------|-------------------|-----|-----|
|      | g            | g                 | g             | mL                         | g                                    | g                 | g              | g                 | g    | g       | g                 | g                               | g           | g         | g            | g       | g            | mL                        | g                                    | g               | g    | g    | g        | g                 | g              | g          | g            | mL               | g             | g                                    |                         |                   |     |     |
| SM3  | 50.0         |                   |               |                            |                                      | 2.5               |                |                   |      | 5.0     |                   | 0.3                             |             |           |              |         |              |                           |                                      | 3.0             |      |      |          |                   |                | 25.0       |              |                  |               |                                      |                         | x                 |     | 7.0 |
| SM5  |              |                   | 20.0          |                            |                                      | 0.4               |                |                   |      | 15.0    | 10.0              |                                 |             |           |              |         | 8.0          |                           |                                      |                 |      |      |          |                   |                |            |              |                  |               |                                      |                         | x                 |     | 7.2 |
| SM6  | 20.0         |                   |               |                            |                                      |                   |                | 40.0              |      |         |                   |                                 |             |           |              |         | 0.5          |                           |                                      |                 |      | 2.5  |          |                   |                |            |              |                  |               |                                      |                         | x                 |     | 7.0 |
| SM7  |              |                   |               | 10.0                       |                                      |                   |                |                   |      |         | 20.0              | 2.0                             | 1.5         | 15.0      |              |         | 10.0         |                           |                                      |                 | 20.9 | 0.5  |          |                   |                |            |              | 5.0              |               |                                      | x                       |                   | 6.5 |     |
| SM12 |              |                   | 4.0           |                            |                                      | 5.0               |                |                   |      | 50.0    |                   |                                 |             |           |              |         | 4.0          |                           |                                      |                 |      | 2.5  |          |                   |                | 10.0       |              |                  |               |                                      |                         | x                 |     | 7.6 |
| SM14 |              | 20.0              |               |                            |                                      |                   |                |                   |      | 10.0    |                   |                                 |             |           |              |         | 5.0          |                           |                                      |                 |      | 5.0  |          |                   |                |            |              |                  |               | 0.01                                 | x                       |                   | 7.0 |     |
| SM15 |              |                   |               |                            | 0.029                                |                   | 11.5           |                   | 0.25 |         | 23.0              | 0.5                             |             |           |              |         |              | 0.49                      |                                      | 20.9            | 0.5  |      |          |                   |                |            | 5.0          |                  |               | x                                    |                         | 6.5               |     |     |
| SM18 |              |                   |               |                            |                                      | 8.0               |                |                   |      | 15.0    |                   |                                 |             |           |              |         |              |                           | 20.0                                 |                 |      |      |          | 25.0              | 40.0           |            |              |                  |               |                                      | x                       |                   | 7.2 |     |
| SM19 |              |                   |               |                            |                                      |                   |                |                   |      | 2.0     |                   |                                 |             |           |              |         |              |                           |                                      |                 |      |      | 15.0     |                   |                |            | 40.0         |                  |               |                                      | x                       |                   | 6.0 |     |
| SM20 |              |                   | 5.0           |                            |                                      |                   |                |                   |      |         |                   |                                 |             |           |              | 20.0    | 5.0          |                           | 1.0                                  |                 |      | 3.0  |          |                   |                |            |              |                  | 3.0           |                                      | x                       |                   | 7.2 |     |
| SM25 |              |                   | 10.0          |                            |                                      |                   |                |                   |      |         | 40.0              |                                 |             |           | 21.0         |         |              |                           |                                      |                 |      |      |          |                   |                |            |              |                  |               |                                      | x                       |                   | 6.3 |     |
| SM30 |              |                   |               |                            |                                      |                   |                |                   |      | 2.0     |                   |                                 |             |           |              |         |              |                           |                                      |                 |      |      | 15.0     |                   |                |            | 40.0         |                  |               |                                      |                         | x                 |     | 4.5 |
| SM32 |              |                   | 10.0          |                            |                                      |                   |                |                   |      |         | 40.0              |                                 |             |           | 21.0         |         |              |                           |                                      |                 |      |      |          |                   |                |            |              |                  |               |                                      | x                       |                   | 4.5 |     |

**TABLE S2 Putative NMR assignments. ND = not determined.**

| Amino Acid | Position        | $\delta$ H | $\delta$ C | Amino Acid | Position   | $\delta$ H | $\delta$ C |
|------------|-----------------|------------|------------|------------|------------|------------|------------|
| 1-Cys      | NH <sub>2</sub> | ND         | -          | 12-Phe     | NH         | ND         | -          |
|            | $\alpha$        | ND         | ND         |            | $\alpha$   | ND         | ND         |
|            | $\beta$         | ND         | ND         |            | $\beta$    | ND         | ND         |
| 2-Ala      | NH              | 8.00       | -          |            | $\gamma$   | -          | ND         |
|            | $\alpha$        | 4.24       | 48.6       |            | $\delta$   | 7.17       | 129.3      |
|            | $\beta$         | 1.19       | 20.9       |            | $\epsilon$ | 7.21       | 128.6      |
| 3-Ser      | NH              | 8.54       | -          | $\phi$     |            | 127.0      |            |
|            | $\alpha$        | 5.22       | 54.3       | 13-Ala     | NH         | 7.42       | -          |
|            | $\beta$         | 3.76       | ND         |            | $\alpha$   | 4.64       | 54.1       |
| 4-S-Abu    | NH              | 7.83       | -          | $\beta$    | 1.19       | 18.6       |            |
|            | $\alpha$        | 4.38       | 60.8       | 14-Cys     | NH         | 8.80       | -          |
|            | $\beta$         | 3.29       | 48.0       |            | $\alpha$   | 3.24       | 56.9       |
|            | $\gamma$        | 1.11       | 19.1       |            | $\beta$    | 2.74       | 35.7       |
| 5-Cys      | NH              | 9.02       | -          |            | 2.64       |            |            |
|            | $\alpha$        | 4.30       | 55.4       | 15-HO-Asp  | NH         | 7.17       | -          |
|            | $\beta$         | 2.60       | 38.5       |            | $\alpha$   | 4.53       | 58.6       |
|            |                 | 2.30       |            |            | $\beta$    | 4.30       | 72.4       |
|            |                 |            | OH         |            | 3.82       | -          |            |
| 6-N-Ala    | NH              | 7.81       | -          | 16-Gly     | NH         | 7.48       | -          |
|            | $\alpha$        | 4.95       | 55.8       |            | $\alpha$   | 4.42       | 58.7       |
|            | $\beta$         | 3.76       | 64.4       |            | 4.65       |            |            |
| 7-Ala      | NH              | ND         | -          | 17-Ser     | NH         | 8.36       | -          |
|            | $\alpha$        | ND         | ND         |            | $\alpha$   | 5.00       | 53.8       |
|            | $\beta$         | 1.18       | 19.4       |            | $\beta$    | 3.52       | 70.3       |
| 8-Gly      | NH              | ND         | -          | OH         | 5.33       | -          |            |
|            | $\alpha$        | ND         | ND         | 18-S-Abu   | NH         | 8.47       | -          |
| 9-Pro      | $\alpha$        | 3.98       | 61.4       |            | $\alpha$   | 3.62       | 56.2       |
|            | $\beta$         | 1.63       | 29.2       |            | $\beta$    | 1.85       | 24.9       |
|            | $\gamma$        | 1.85       |            | $\gamma$   | ND         | ND         |            |
|            | $\delta$        | 3.62       | 46.9       | 19-Lys     | NH         | ND         | -          |
| 10-Phe     | NH              | ND         | -          |            | $\alpha$   | ND         | ND         |
|            | $\alpha$        | ND         | ND         |            | $\beta$    | ND         | ND         |
|            | $\beta$         | 2.97       | 36.2       |            | $\gamma$   | ND         | ND         |
|            | $\gamma$        | -          | ND         |            | $\delta$   | ND         | ND         |
|            | $\delta$        | 7.29       | 128.8      |            | $\epsilon$ | ND         | ND         |
|            | $\epsilon$      | 7.11       | 129.4      |            | NH         | ND         | -          |
|            | $\phi$          |            | 126.7      |            | COOH       | -          | 10.22      |
| 11-S-Abu   | NH              | ND         | -          |            |            |            |            |
|            | $\alpha$        | ND         | ND         |            |            |            |            |
|            | $\beta$         | ND         | ND         |            |            |            |            |
|            | $\gamma$        | ND         | ND         |            |            |            |            |
